# Supplementary material
Source: publisher site journal article supplement (https://static.cambridge.org/content/id/urn:cambridge.org:id:article:S0007114520003773/resource/name/S0007114520003773supp001.docx)
Supplement: Supplementary file 1 [file S0007114520003773supp001.docx]

Supplement

| Supplementary Table 1 - Description of studies that explored the characteristics of seafood consumers. | | | | | |
| --- | --- | --- | --- | --- | --- |
| Author(s), year | Sample size | Country | Study design | Population description | Intake measurement |
| Akbaraly et al, 2008 | n'=10,308 | UK* | Prospective cohort | 67% men. 35-55 years. | FFQ† |
| Alkerwi et al, 2014 | n'=1,152 | Luxembourg | Cross-sectional | 50% men. 18-69 years. | FFQ |
| Anderson et al, 2018 | n'=3,045 | USA‡ | Cross-sectional | 51% women. 45-84 years. | FFQ |
| Barton et al, 2014 | n'=11,374 | UK | Cross-sectional | Scottish households (n=5020) | Record. |
| Belin et al, 2011 | n'=84,493 | USA | Cross-sectional | Women only. 50-79 years. | FFQ |
| Belle et al, 2017 | n='10,820 | Switzerland | Cross-sectional | Childhood Cancer Survivors, their siblings and the Swiss population. Over 18 years. | Interview |
| Bonaccio et al, 2017 | n'=2,624 | Italy | Prospective cohort | 54% women. 35-67 years. | FFQ |
| Brasky et al, 2014 | n'= 22,494 | USA | Prospective cohort | Women only. 50-76 years. | FFQ |
| Burger, 2018 | n'=460 | USA | Cross-sectional | 18-78 years. | Interview |
| Buscemi et al, 2014 | n'=1231 | Italy | Cross-sectional | 62.2% women. 18-89 years. | FFQ |
| Chavarro et al, 2008 | n'=20,167 | USA | Prospective cohort | Men only. 40-84 years. | FFQ |
| Christensen et al, 2017 | n'=7,891 | USA | Cross-sectional | 51.4% Women. Over 12 years. | Interview |
| Chung et al, 2008 | n'=900 | USA | Cross-sectional | 57% women. 45-84 years. | FFQ |
| Clonan et al, 2012 | n'=842 households | UK | Cross-sectional | Nottinghamshire residents. | FFQ |
| Crowe et al, 2008 | n'=2,793 | New Zealand | Cross-sectional | Over 50% women. >15 years. | 24-hour recall |
| Dijkstra et al, 2014 | n'=1,057 | Netherlands | Prospective cohort | 52.5% women. 55-85 years. | FFQ |
| Gale et al, 2008 | n'=217 | UK | Prospective cohort | Women only. Over 16 years. | FFQ |
| Gaskins et al, 2018 | n'=501 couples | USA | Prospective cohort | Couples, <18 years. | Interview |
| Giuli et al, 2012 | n'=306 | Italy | Cross-sectional | 57% women. Over 65s. | FFQ |
| Haggarty et al, 2009 | n'=1461 | UK | Prospective cohort | Pregnant women only. Mean age at delivery 30.4 years. | FFQ, dietary record. |
| Hansen-Krone et al, 2014 | n'=27,158 | Norway | Cross-sectional | 47.6% Men. 25-97 years. | FFQ |
| Haraldsdottir et al, 2017 | n'=9,340 | Iceland | Prospective cohort | Women without breast cancer at baseline. 32-88 years. | FFQ |
| He et al, 2009 | n'=5,677 | USA | Cross-sectional | 53% women. 45-84 years. | FFQ |
| Heppe et al, 2011 | n'=3,380 | Netherlands | Prospective cohort | Women only. 15.7-46.3 years. | FFQ |
| Hostenkamp et al, 2009 | n'=3,422 | Denmark | Cross-sectional | 52% women. 16-80 years. | FFQ |
| Inelmen et al, 2008 | n'=395 | Italy | Cross-sectional | 80% women. 18-82 years. | Interview |
| Jahns et al, 2014 | n'=15,407 | USA | Cross-sectional | 52.3% women. 19-30 years. | 24-hour recall |
| Jimenez-Redondo et al, 2016 | n'=98 | Spain | Cross-sectional | 66% women. >80 years. | 24-hour recall |
| Johansson et al, 2018 | n'=2,332 | USA | Cross-sectional | 50% men. 70 years old. | FFQ |
| Karlsson et al, 2017 | n '=2,874 | Norway | Cross-sectional | 57% women. 46–49 years. | FFQ |
| Karlsson et al, 2018 | N'=2,324 | Norway | Cross-sectional | 80% men. 28-85 years. | FFQ |
| Kim et al, 2016 | n'=4,356 | USA | Prospective cohort | Men and Women. 18-30 years. | FFQ |
| Kossioni et al, 2010 | n'=130 | Greece | Cross-sectional | 57% women. 18-92 years. | Interview |
| Lake et al, 2009 | n’=198 | UK | Cross-sectional | 32-33 years. | Dietary record |
| Langlois and Ratnayake, 2015 | n'=1,984 | Canada | Cross-sectional | 50.4% Women. 20-79 years. | FFQ |
| Larsson et al, 2016 | n'=6,095 | Sweden | Prospective cohort | 59 % men. 45-83 years. | FFQ |
| Lê et al, 2013 | n'=3,188 | France | Cross-sectional | 49% men. 35-64 years. | Dietary record, FFQ. |
| Lee et al., 2012 | n'= 2,261 | USA | Cross-sectional | 62% women. 45 to 72 years from 13 American Indian tribes | FFQ |
| Levitan et al, 2010 | n'=36,234 | Sweden | Cross-sectional | 48-53 years. | FFQ |
| Li et al, 2011 | n'=5,068 | USA | Prospective cohort | 40% men. 25-74 years. | FFQ |
| Li et al, 2013 | n'=4,162 | USA | Prospective cohort | Men and women. 18-30 years. | FFQ |
| Maguire et al, 2014 | n'=1,491 | UK | Cross-sectional | 50% women. Over 19 years. | Dietary record |
| Marushka et al, 2018 | n'=1,103 | Canada | Cross-sectional | 64% Women. Mean age 45.7 years. | 24-hour recall, FFQ. |
| McCartney et al, 2013 | n'=221 | Ireland | Cross-sectional | Women only. 18-35 years. | Diet history |
| Meier et al, 2010 | n'=1,786 | Switzerland | Cross-sectional | 48.4% women, 15-24 years. | Interview |
| Mendez et al, 2010. | n'=657 | Spain | Prospective cohort | Women only. | FFQ |
| Miura et al, 2012. | n'=859 | Australia | Cross-sectional study | 59% women. 25-64 years. | Mail Survey |
| Mohanty et al, 2016 | n'=3279 | USA | Cross-sectional | Women only. | FFQ |
| Monastero et al, 2016 | n'=285 | USA | Cross-sectional | 58.6% Women. Over 15 years. | FFQ |
| Mozaffarian et al, 2008 | n'=4,263 | USA | Cross-sectional | 61% women. Over 65. | FFQ, Dietary record. |
| Mullie et al, 2009 | n'=5,000 | Belgium | Cross-sectional | Military men. 20-59 years. | FFQ |
| Nahab et al, 2016 | n'=16,479 | USA | Prospective cohort | 55% women. >40 years old. | FFQ |
| Nair et al, 2014 | N’=408 | USA | Cross-sectional | Women only. 18-49 years. | Interview |
| Nordgren et al, 2017 | n'=7,266 | USA | Cross-sectional | Women only. 14-45 years. | 24-hour recall |
| Papier et al, 2015 | n'=728 | Australia | Cross-sectional | 55% women. Over 18s (first year university students). | FFQ |
| Patel et al, 2009 | n'=21,984 | Europe | Prospective cohort | 55% Women. Mean age 60 years. | FFQ |
| Pavlovic et al, 2012 | n'=379 | Croatia | Prospective cohort | 56% women. 55-78 years. | FFQ |
| Pfeiler and Egolff, 2018 | n’= 13,062 and 15,036) | Germany and Australia | Cross-sectional | 54% women in Germany, 53% women in Australia. 21–102 years. | Interview |
| Picot et al, 2010 | n'=512 | France | Cross-sectional | 62% Men. 19–83 years. Recreational seafood harvesters. | FFQ, dietary record. |
| Puolakka et al, 2018 | n'=3,453 | Finland | Prospective cohort | ~50% Women, 3-18 at baseline. 31 year follow up. | FFQ |
| Razzaghi et al, 2014 | n'=7,108 | USA | Cross-sectional | Women only. 16-49 years. | 24-hour recall |
| Rosendahl-Riise et al, 2018 | n'=2,865 | Norway | Prospective cohort | 71-74 years | FFQ |
| Salas et al, 2013 | n'=1,388 | Spain | Cross-sectional study | 58% women. 16-65 years. | FFQ |
| Sala-Vila et al, 2011 | n'=198 | Spain | Cross-sectional | 52% Men. Mean age 66 years. 55-80 years. | FFQ |
| Scaglia et al 2016 | n'=100 | Canada | Cross-sectional | Over 50% women. 18-75 years. | FFQ |
| Seiluri et al, 2011 | n'=8,960 | Finland | Prospective cohort | 65% Women. | FFQ |
| Sioen et al, 2013 | n'=3,043 | Belgium | Cross-sectional | 15-98 years. | 24-hour recall |
| Smith et al, 2009 | n'=1,726 | USA | Cross-sectional | Women only. 16-49 years. | FFQ |
| Song et al, 2014 | n'=123,529 | USA | Prospective cohort | 62% Women. 30-75 years. | FFQ |
| Stravik et al, 2019 | n'=567 | Sweden | Cross-sectional | Pregnant women. 25-35 years. | FFQ |
| Strom et al, 2012 | n'=48,627 | Denmark | Prospective cohort | Women only. 15.7– 46.9 years. | FFQ, interview. |
| Tørris et al, 2016 | n'= 23,907 | Norway | Cross-sectional | 52% women. 26–70 years. | FFQ |
| Tørris et al, 2017 | n'= 23,907 | Norway | Prospective cohort | 52% women. 26–70 years. | FFQ |
| Touvier et al, 2010 | n'=4574 | France | Prospective cohort | 54.7% Men. 45–60 years. | 24-hour record |
| Van Woudenbergh et al, 2009 | n'= 4,472 | Netherlands | Prospective cohort | >55 years. | FFQ |
| Varraso et al, 2015 | n'=120,175 | USA | Prospective cohort | 61% women. 30-75 years. | FFQ |
| Virtanen et al, 2008 | n'=40,230 | USA | Prospective cohort | Men only. 40-75 years. | FFQ |
| Virtanen et al, 2010 | n'=1,305 | USA | Cross-sectional | Men and women. Over 65 years. | FFQ |
| Wallin et al, 2017 | n'=35,583 | Sweden | Prospective cohort | Men only. 45-79 years. | FFQ |
| Watt et al, 2009 | n'=3,523 | UK | Cross-sectional | Women only. 60 to 79 years. | FFQ |
| Wennberg et al, 2012 | n'=67,648 | Sweden | Prospective cohort | 52% women. 30-60 years. | FFQ |
| Zamora-Ros et al, 2017 | n'=476,108 | 10 European countries | Prospective cohort | 70% women. 35-70 years. | FFQ, Dietary record, interview |
| * UK, United Kingdom.  † FFQ, Food Frequency Questionnaire.  ‡ USA, United States of America.  § Did not adjust for energy intake | | | | | |
